# Supplementary material for: Swift-kinetics driven RSM optimized, biocompatible AgNPs inhibit uropathogenic biofilms via AHL interference: mechanistic insights from Ag8-SdiA in-silico docking
Source: Research Square preprint supplement (doi:10.21203/rs.3.rs-7963429/v1), 2025-11-03
Supplement: Supplementary file 1 [file 262c78cde5835f84c646d124.docx]

**Supplementary Data**

(**Supplementary Fig. S1A and S1B)**


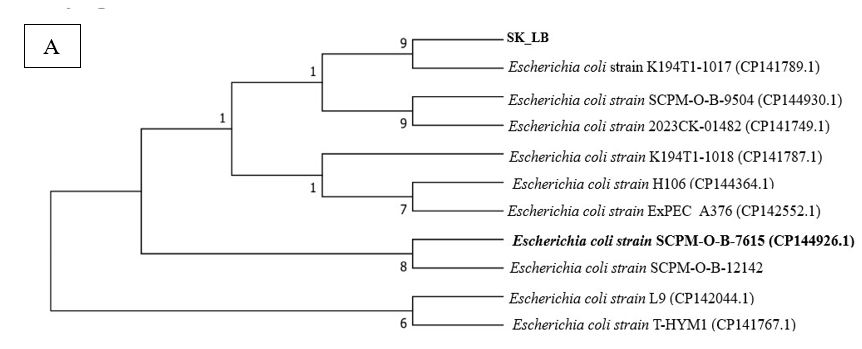


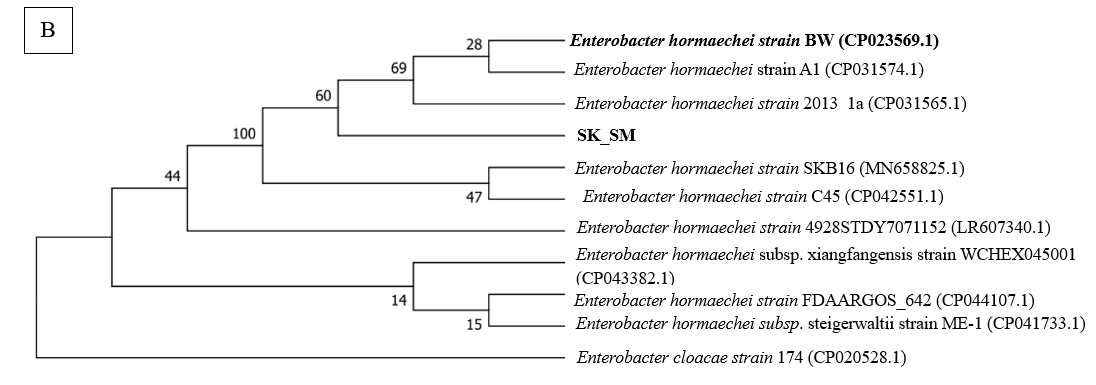


Figure S1(A and B). Evolutionary Relatedness Analysis of *UPEC* and *E. hormaechei* based on 16S rRNA Gene Sequences.

**(Supplementary Figure S2a and S2b)**


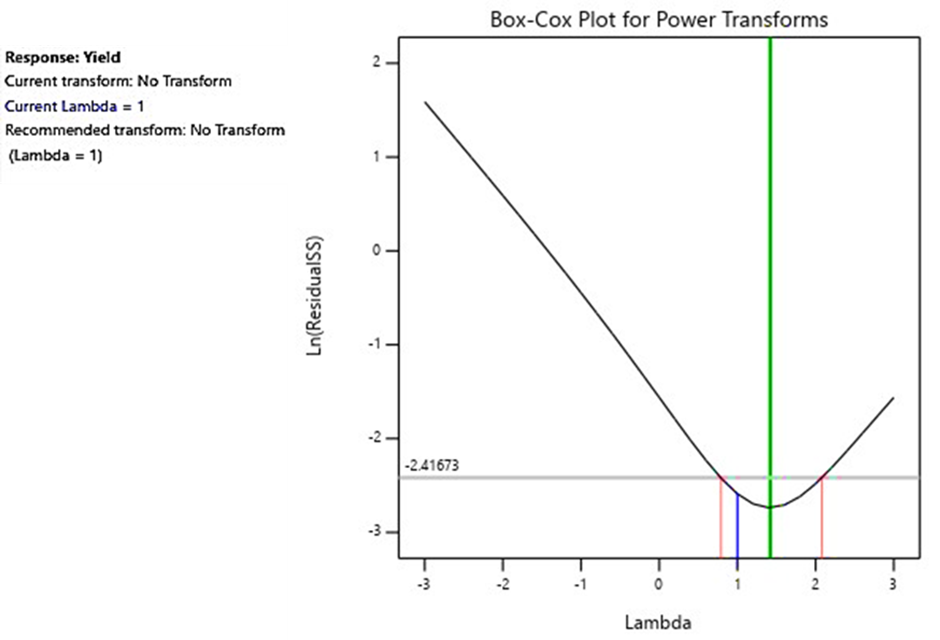


Figure S2a. Box–Cox plot for evaluation of data transformation requirements.


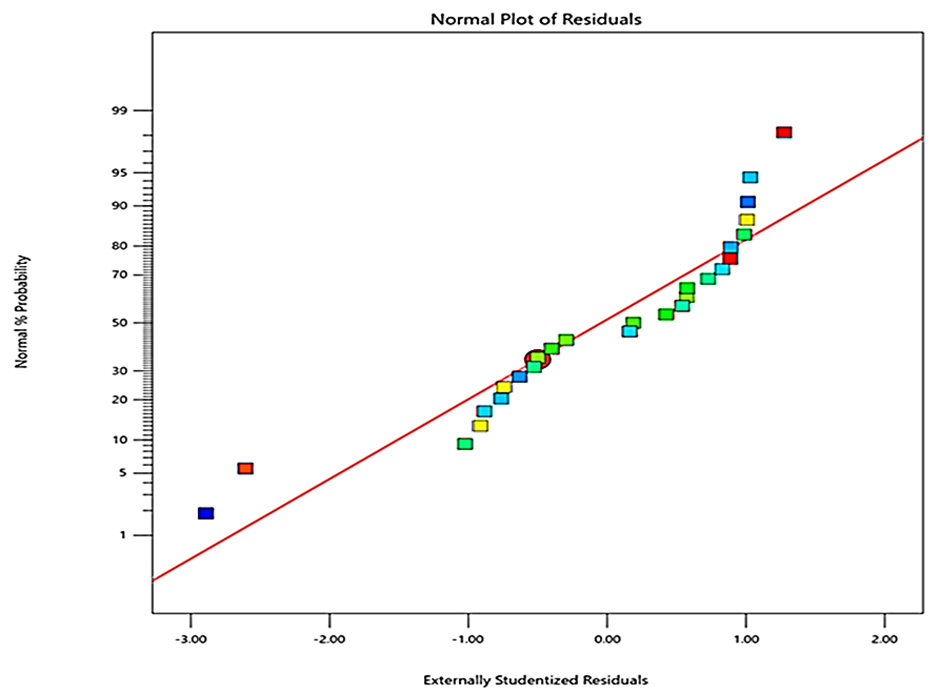


Figure S2b. Normal probability plot of residuals validating model assumptions
